# Supplementary material for: Voltage-Dependent Inactivation of MscS Occurs Independently of the Positively Charged Residues in the Transmembrane Domain
Source: Hindawi journal article supplement (doi:10.1155/2016/2401657), 2016-01-01
Supplement: f1 [file 2401657.f1.docx]

**Supplementary Information**

**Voltage dependent inactivation of MscS occurs independently of the positively charged residues in the transmembrane domain**

Takeshi Nomura1, 2, Masahiro Sokabe1, 3 and Kenjiro Yoshimura1, 4

1International Cooperative Research Project (ICORP)/Solution Oriented Research for Science and Technology (SORST), Cell-Mechanosensing Project, Japan Science and Technology Agency, Nagoya 466-8550, 2Department of Rehabilitation, Kyushu Nutrition Welfare University, Kitakyushu 800-0298, 3Mechanobiology Laboratory, Nagoya University Graduate School of Medicine, Nagoya, 466-8550, 4Department of Machinery and Control Systems, Shibaura Institute of Technology, Saitama 337-8570, Japan

Corresponding author: Takeshi Nomura

Department of Rehabilitation, Kyushu Nutrition Welfare University, Kitakyushu 800-0298, Japan, E-mail: [tnomura@knwu.ac.jp](mailto:tnomura@knwu.ac.jp)

**FIGURE LEGENDS**

Fig. S1 Inactivation of mutant MscS expressed in MJF455 (*ΔmscSΔmscL*) cells. Channel currents of R54N MscS (*A*), R74N MscS (*B*), and R46N/R74N MscS (*C*) at different voltages ranging from –60 to +80 mV. Subsaturating negative pressure was applied after the change in voltage.

Fig. S2 Rate of inactivation in mutant MscS expressed in MJF455 (*Δ*mscS*Δ*mscL) cells. Macroscopic currents of R54N MscS (*A*), R74 N MscS (*B*), and R46N/R74N MscS (*C*). Voltage was changed from –20 to +60 mV in the presence of pressure. Red traces show the traces at the pressure where MscS was activated fully (–143 mmHg in R54N MscS, –161 mmHg in R74N MscS, and –171 mmHg in R46N/R74N MscS).


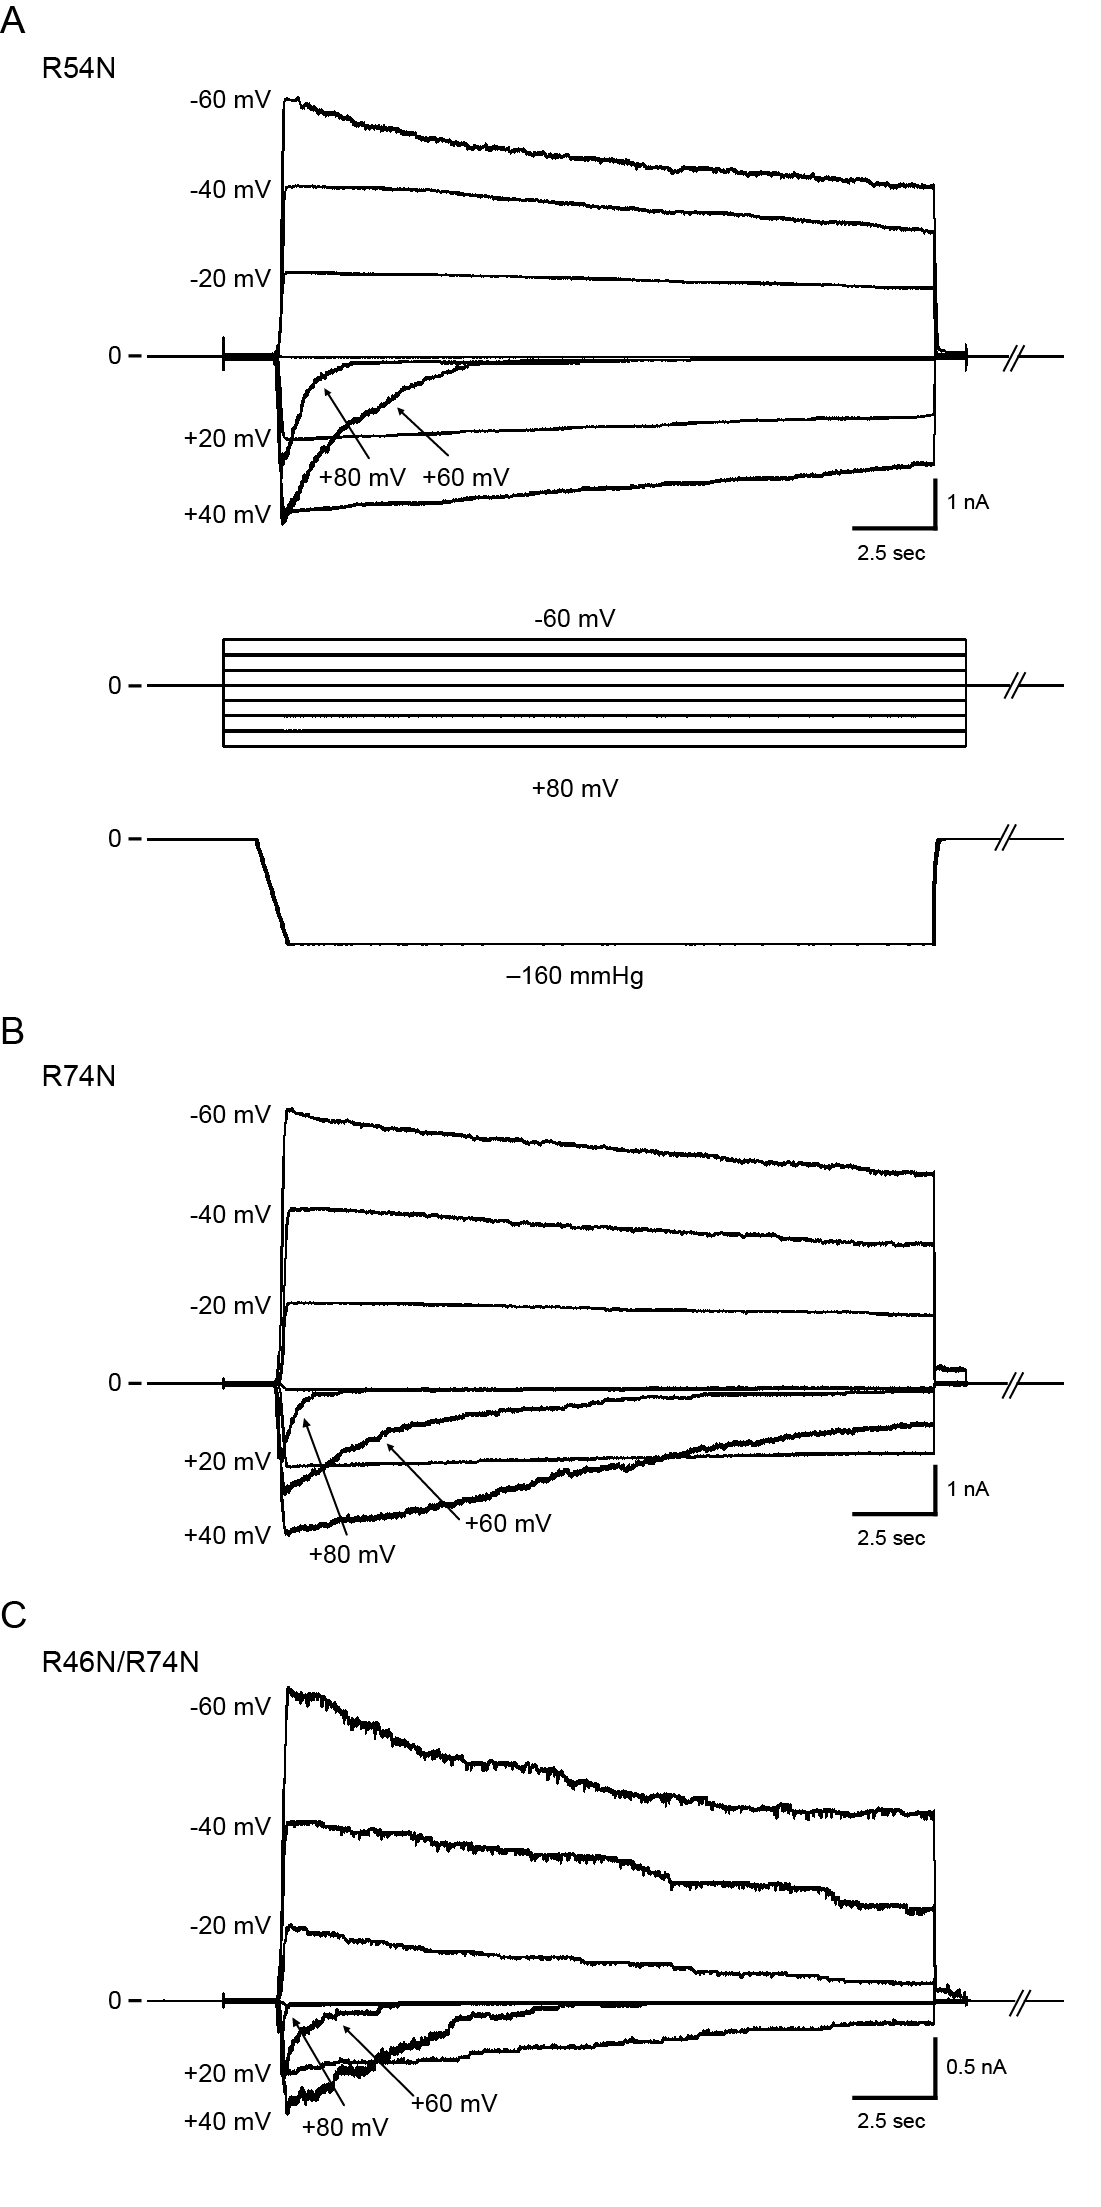


Supplementary Figure 1


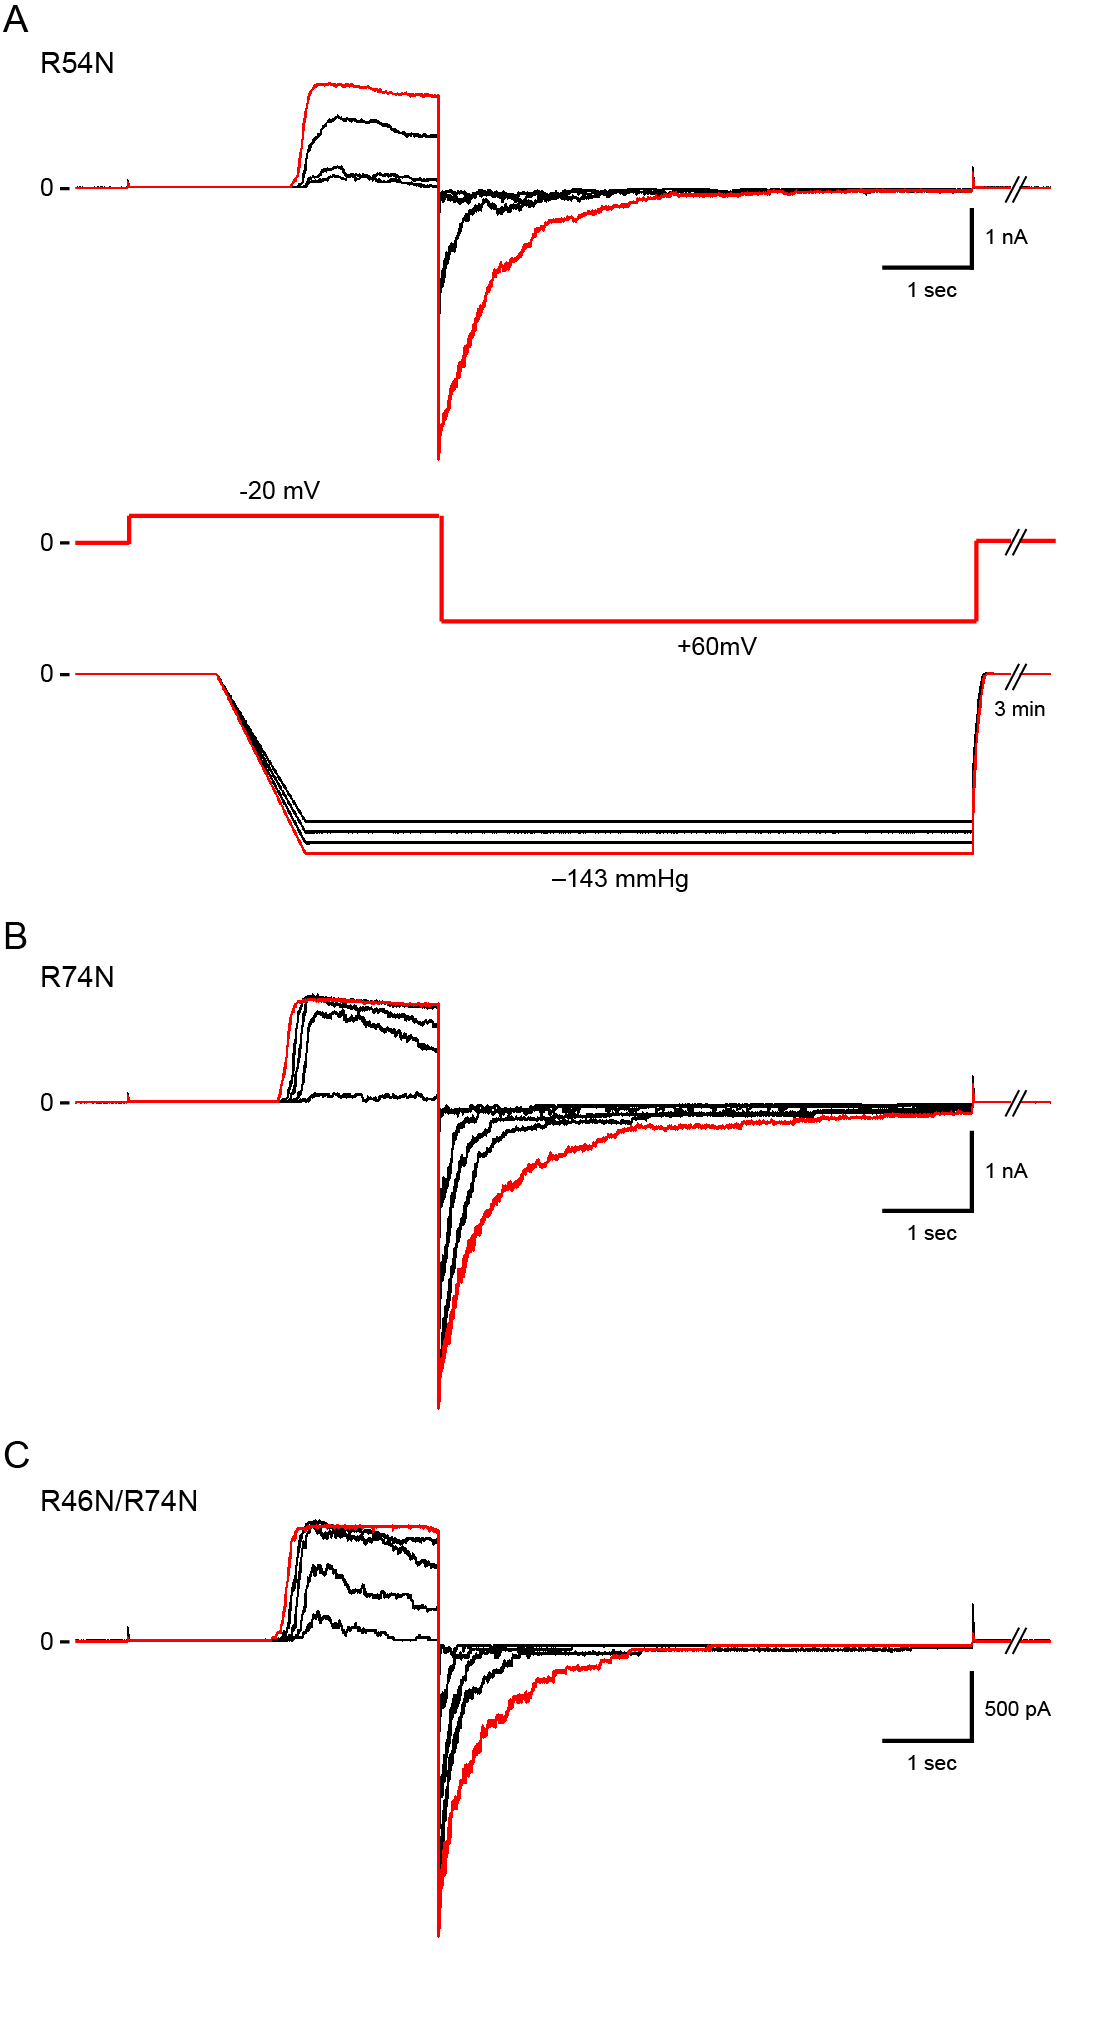


Supplementary Figure 2
